# Supplementary figures and images for: NRPS-like ATRR in Plant-Parasitic Nematodes Involved in Glycine Betaine Metabolism to Promote Parasitism
Source: MDPI journal article supplement (doi:10.3390/ijms25084275), 2024-04-12

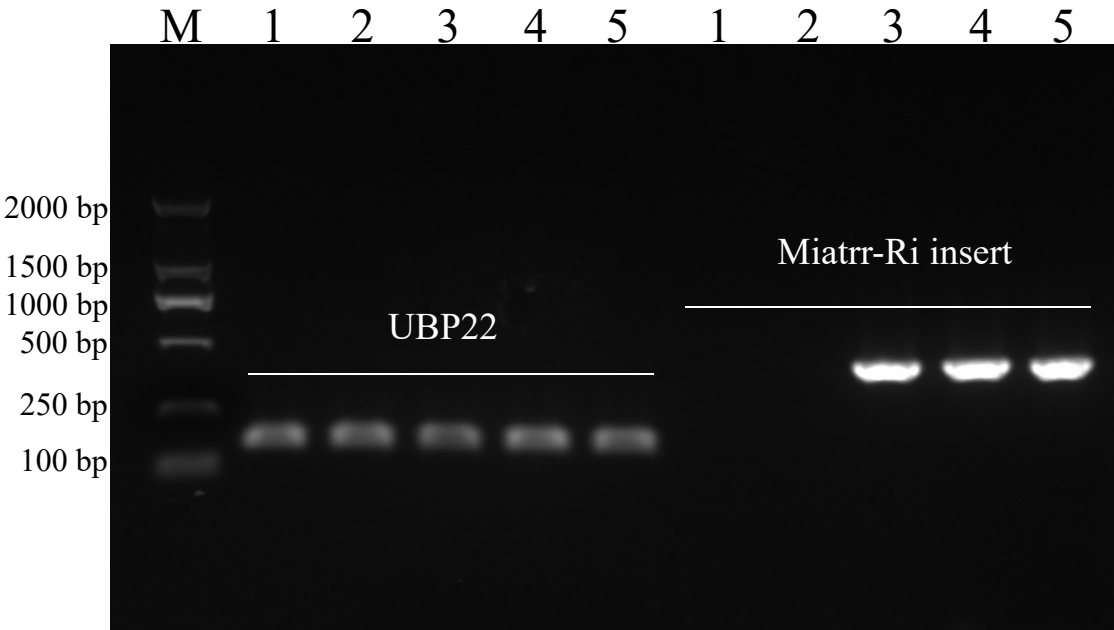

Supplement: s1 [file s1]

**A**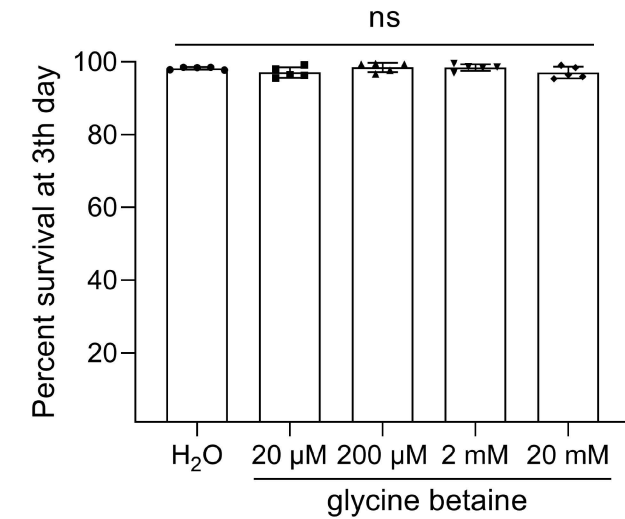**B**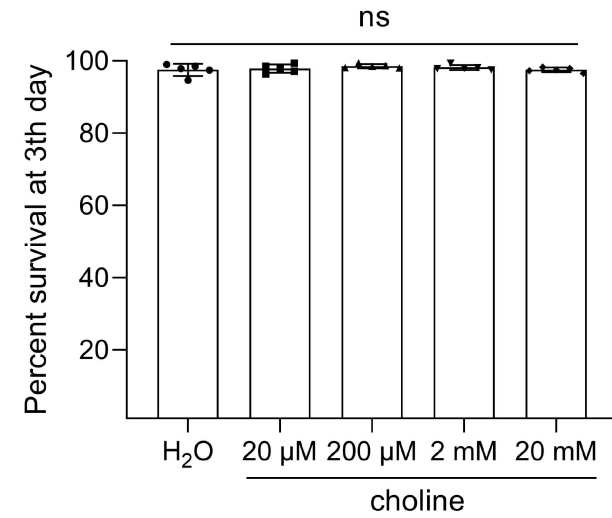**C**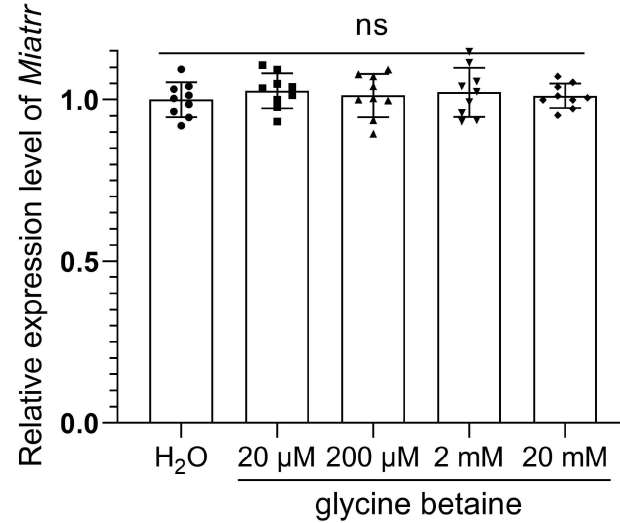**D**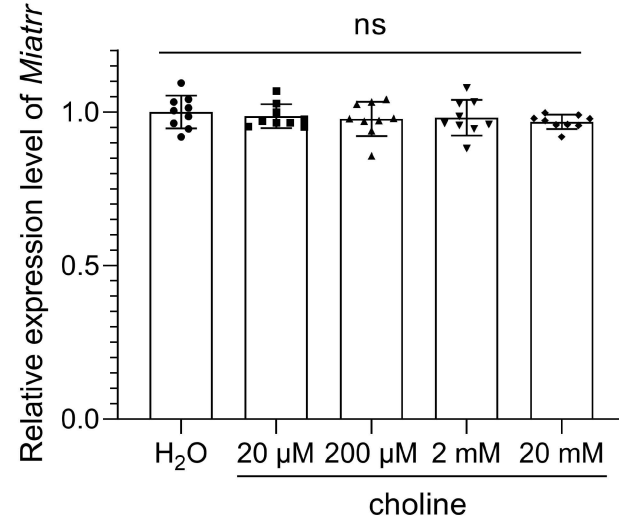

Supplement: s1 [file s1]

A domain align

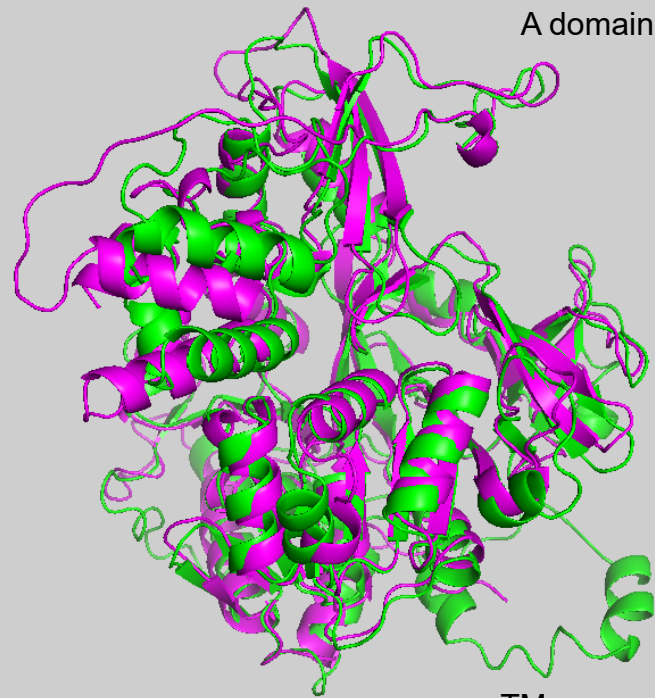

TM-score > 0.82

R1 domain align

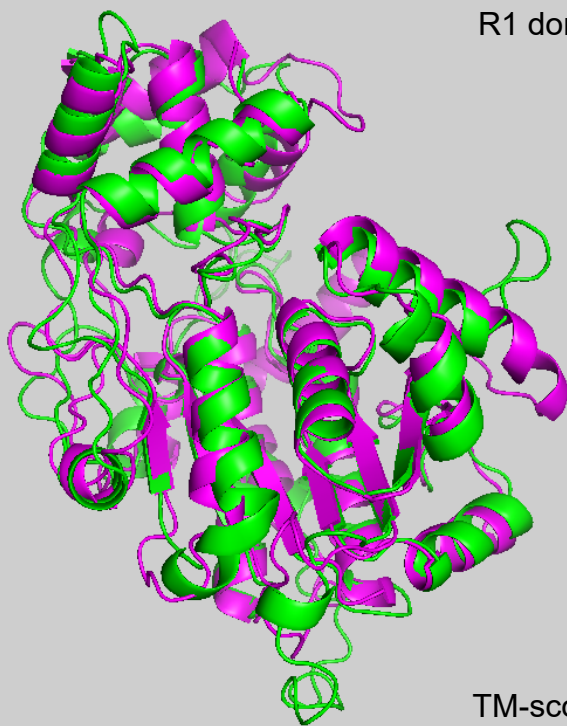

TM-score > 0.82

R2 domain align

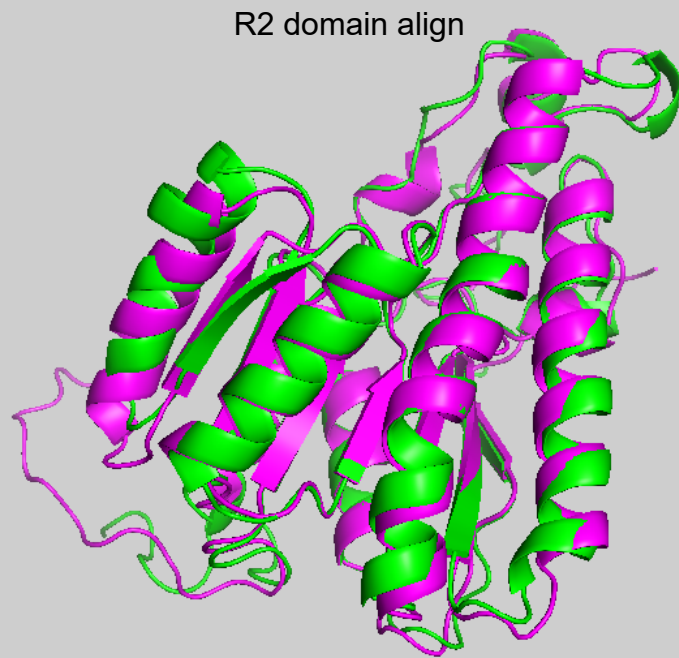

TM-score > 0.88

Supplement: s1 [file s1]
